# Supplementary material for: Integrative functional analysis uncovers metabolic differences between Candida species
Source: PubMed Central journal article supplement (PMC9512779; doi:10.1038/s42003-022-03955-z), 2022-09-26
Supplement: 42003_2022_3955_MOESM2_ESM.pdf [file 42003_2022_3955_MOESM2_ESM.pdf]

a

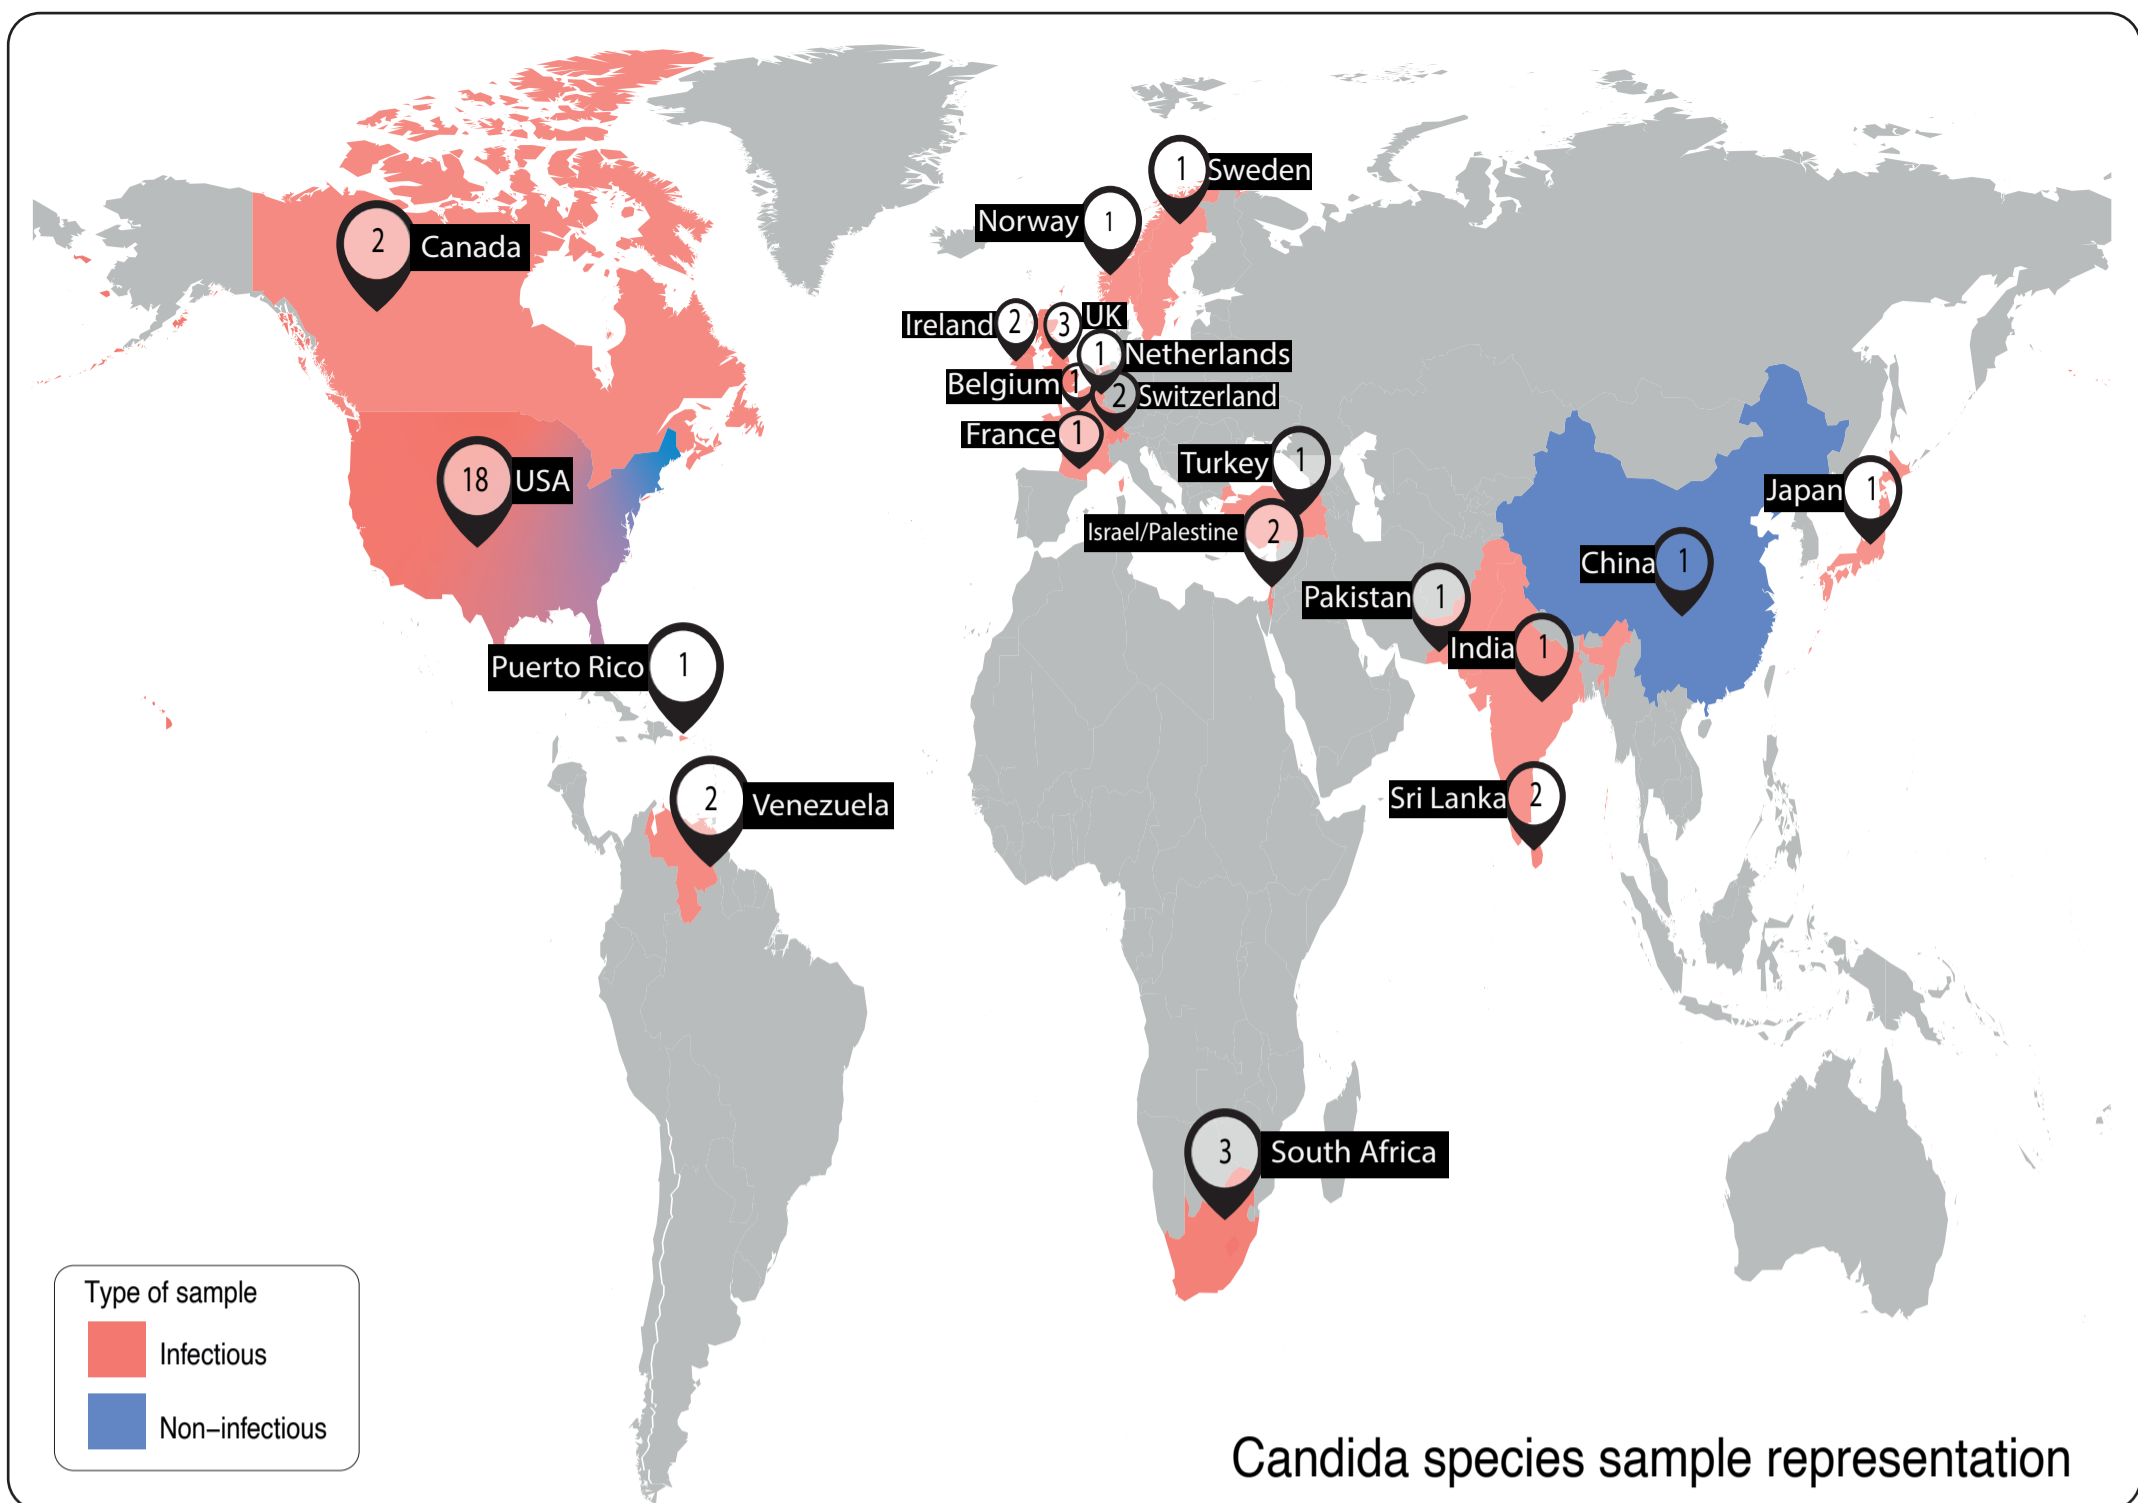

b

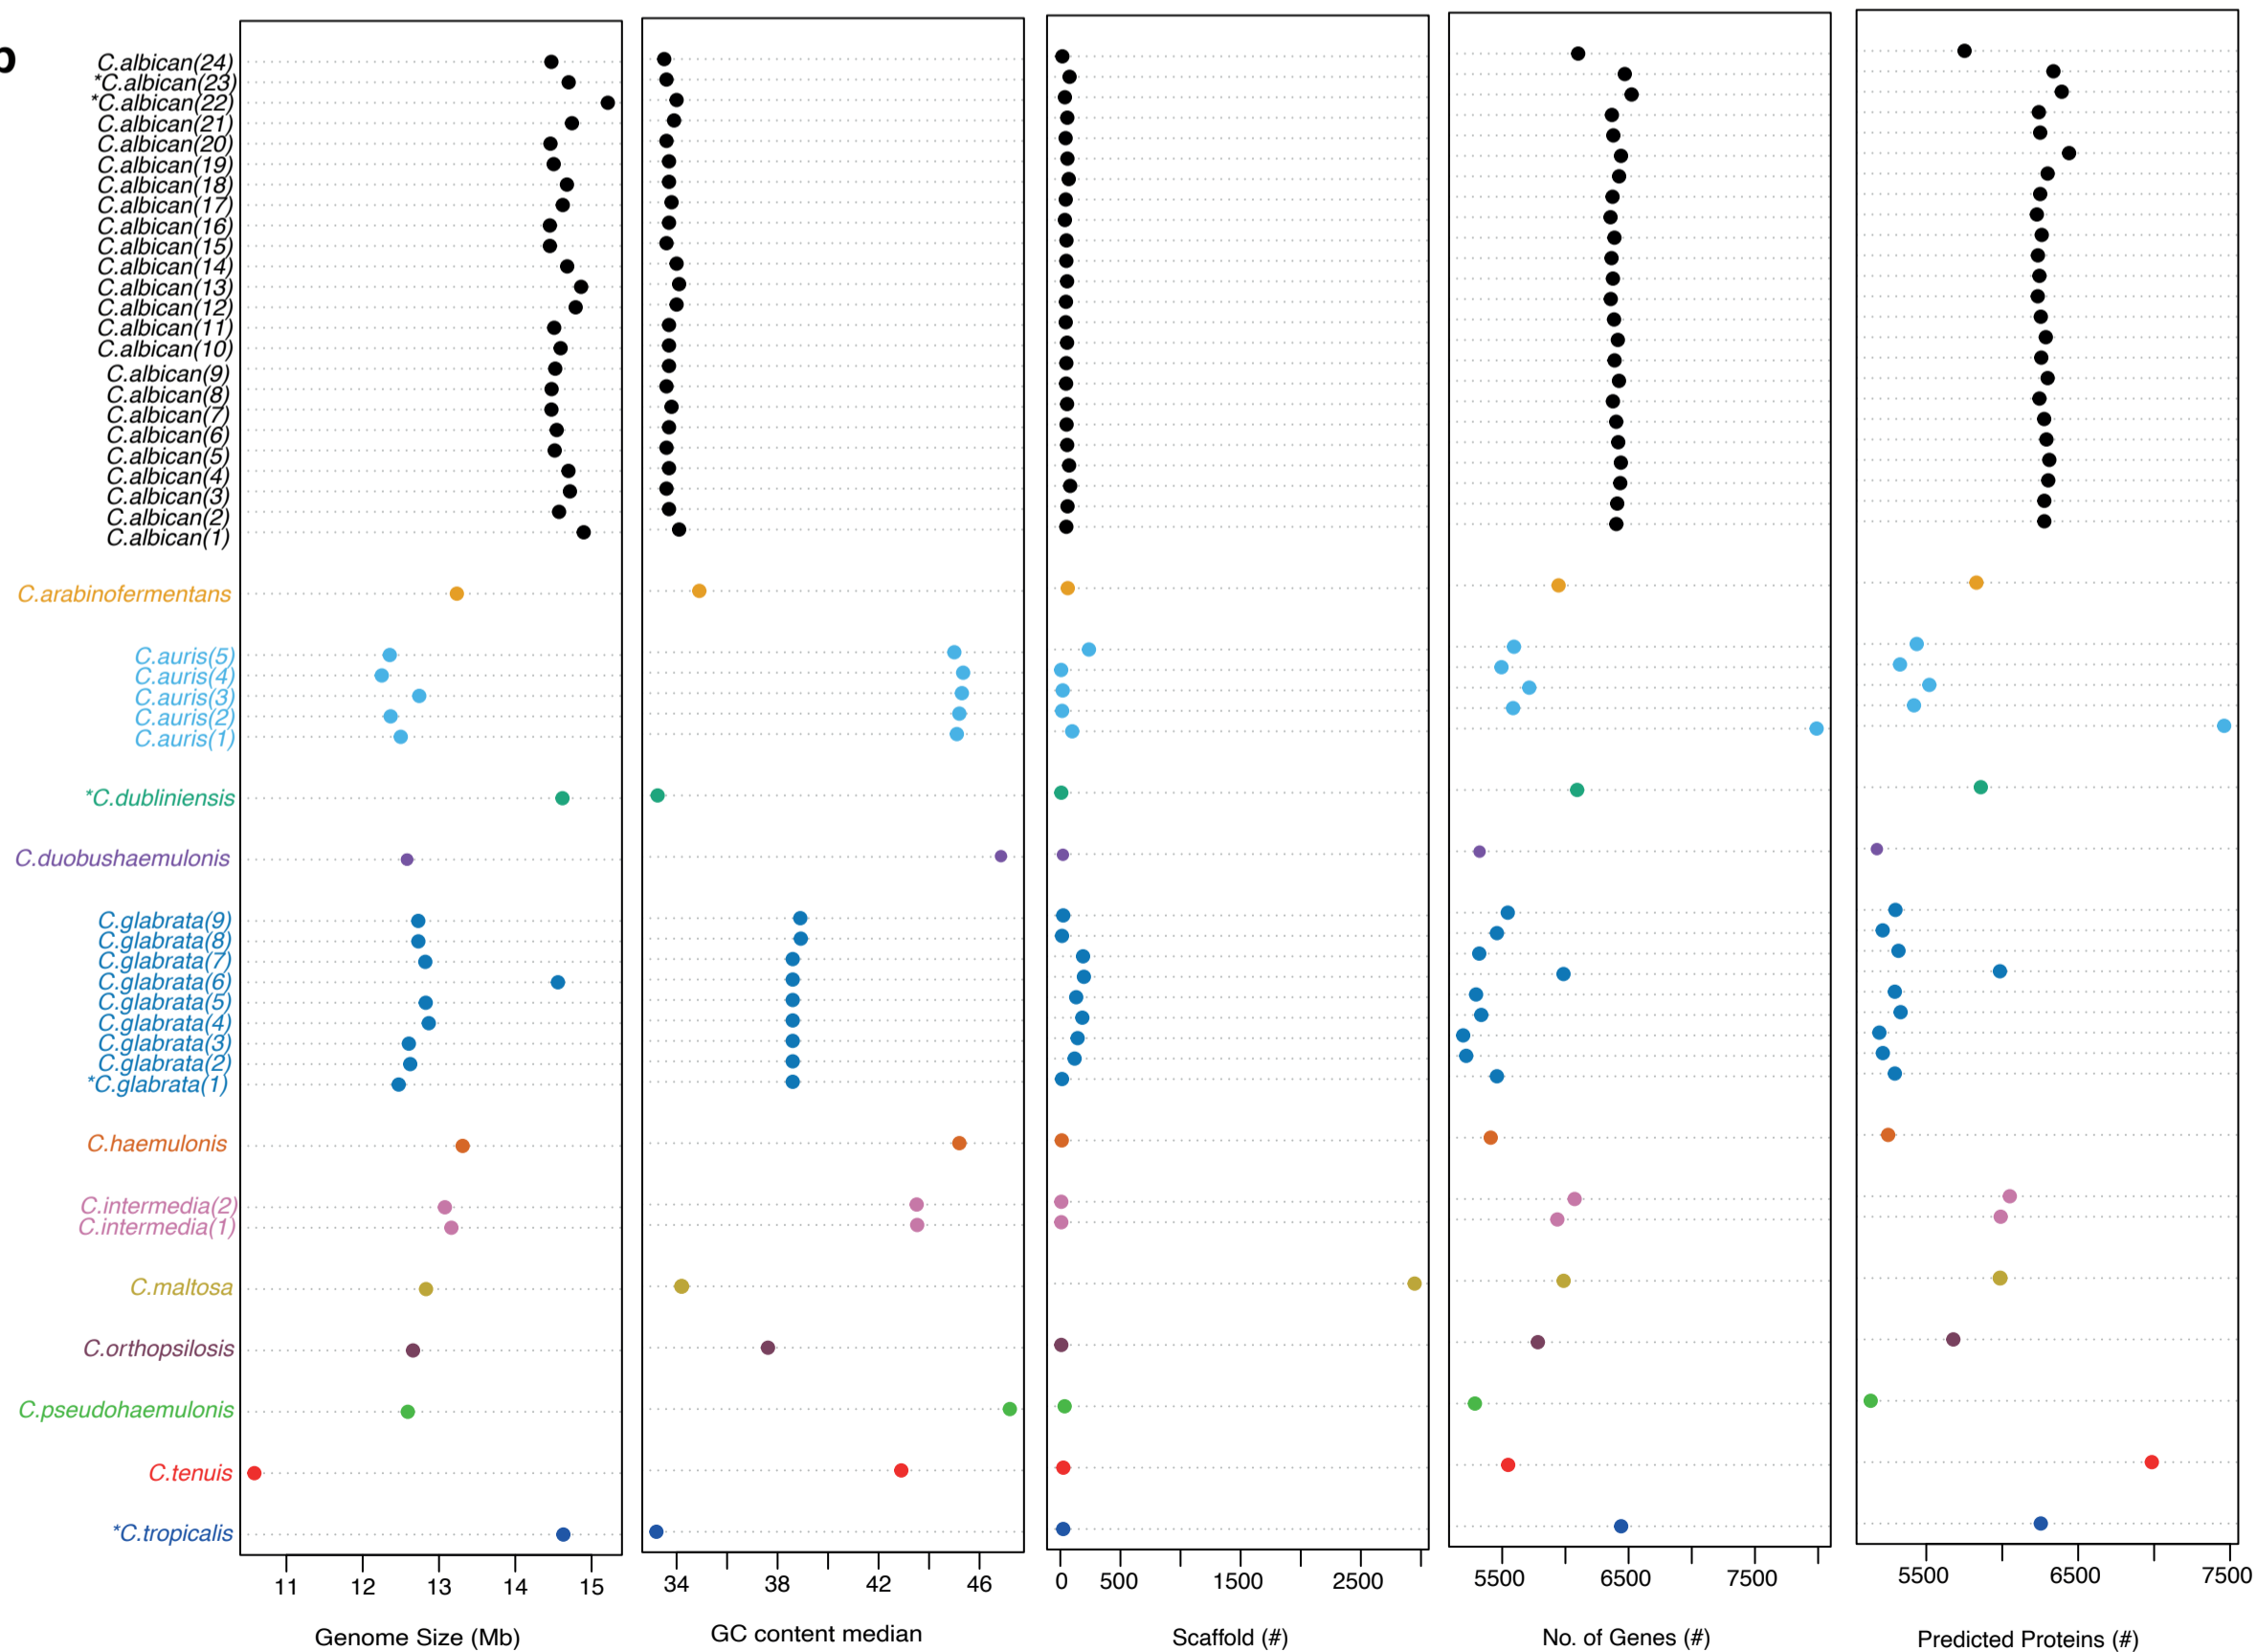

**Supplementary Figure 1.** a, Map of *Candida* species collection. Indication of global representation of samples. b, Sequence quality assessment. Genome size variation, GC content, number of contig and outcome of quality of the sequence.

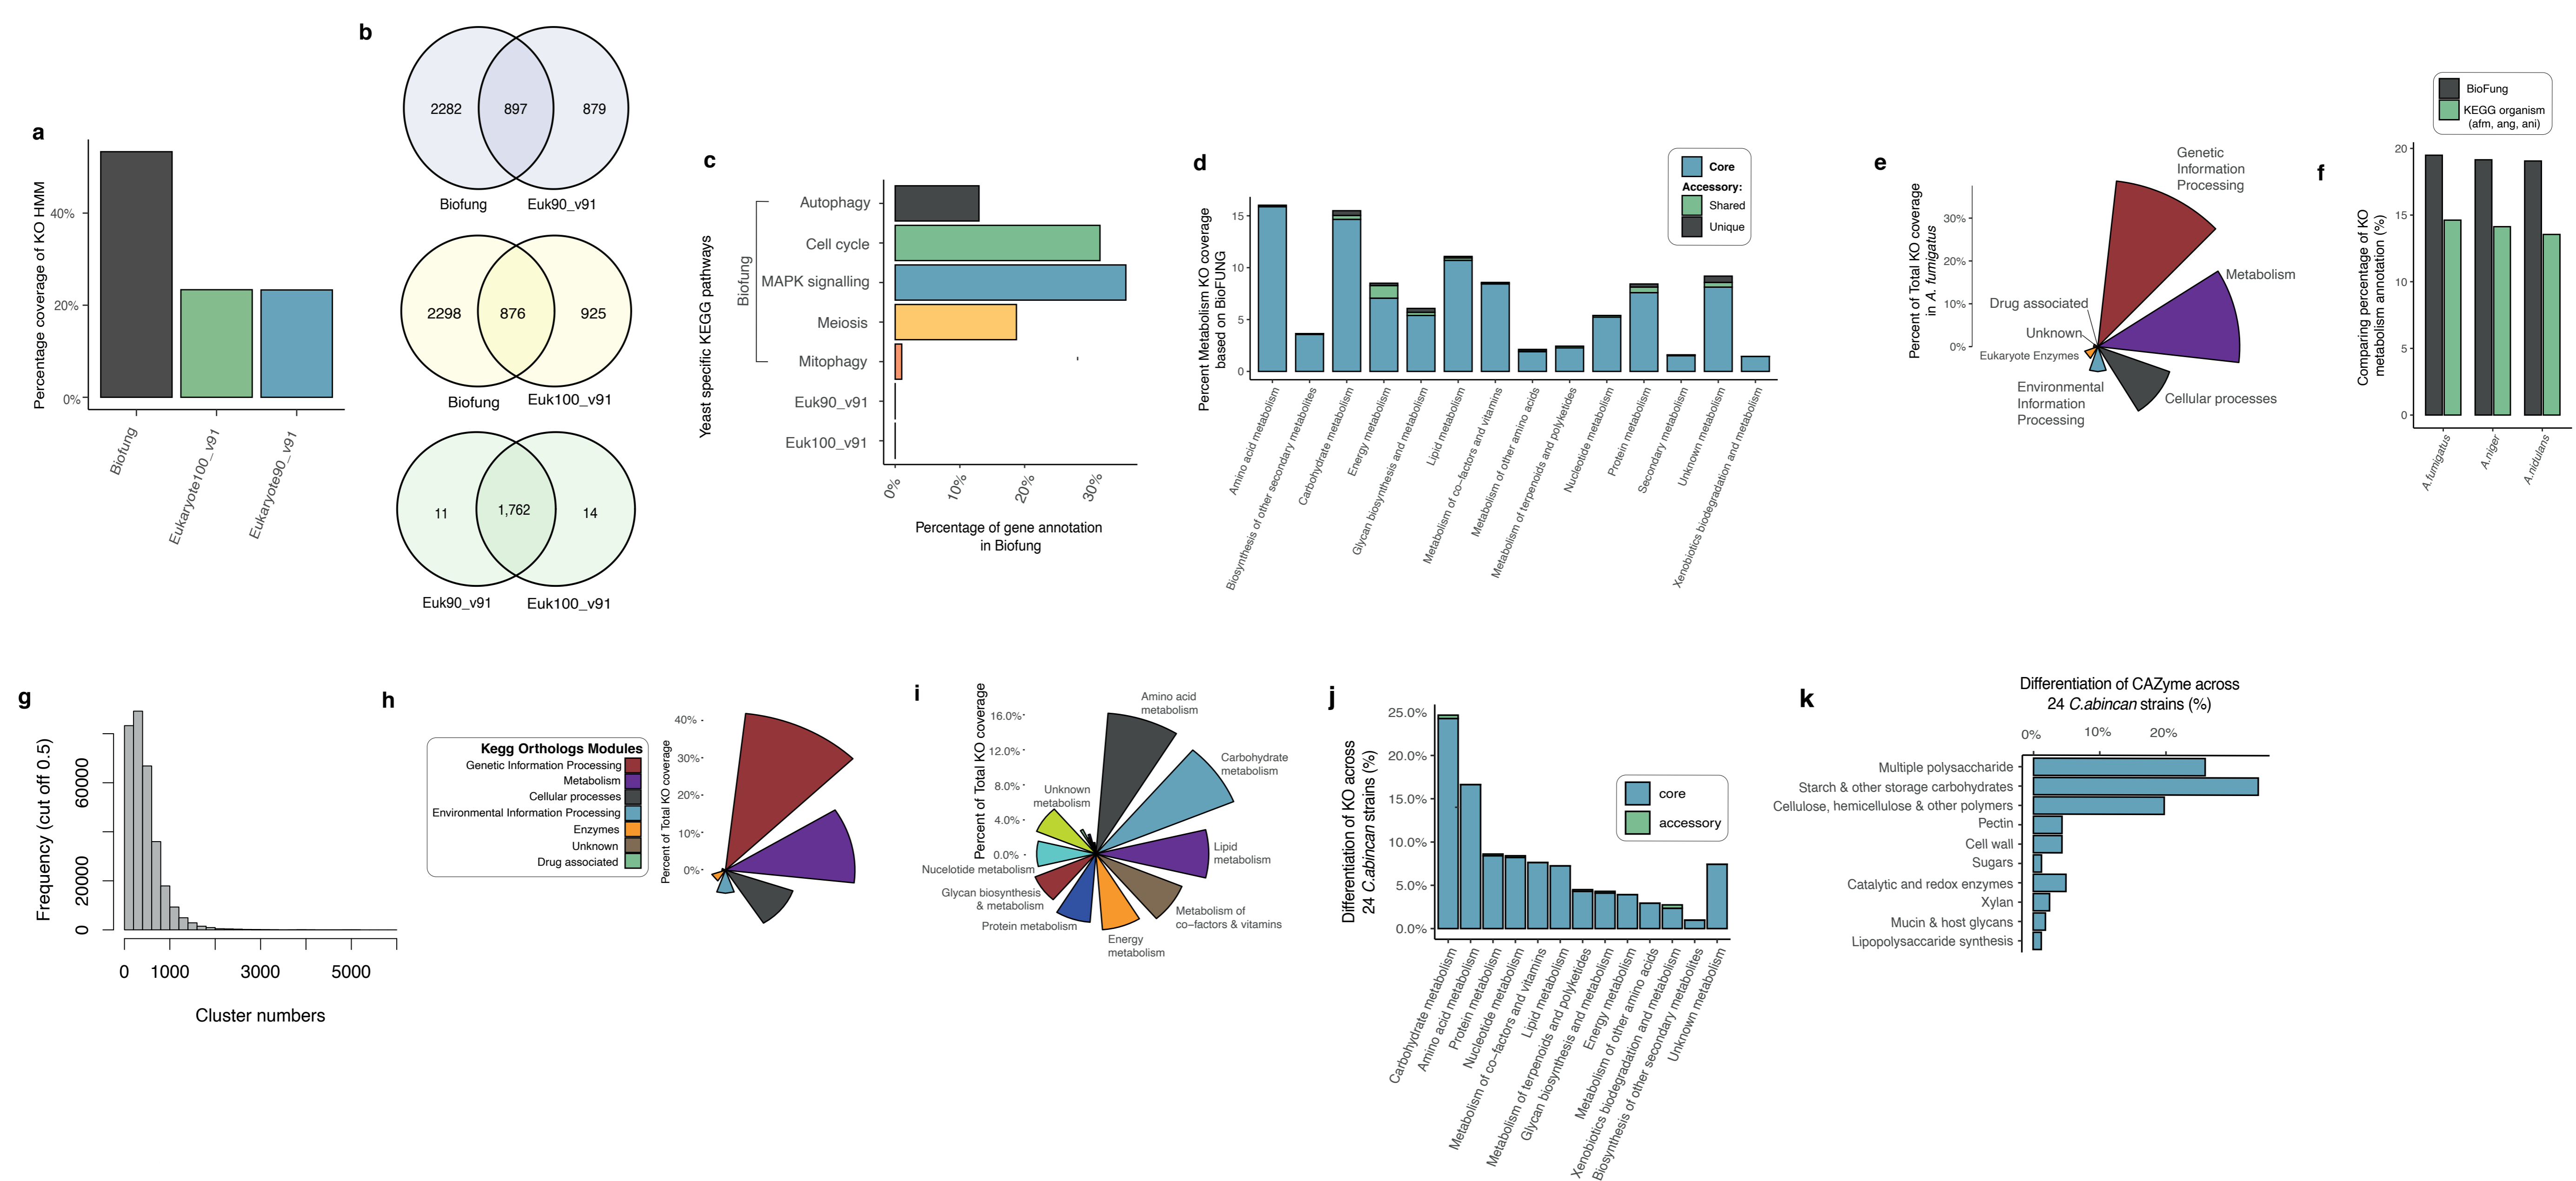

**Supplementary Figure 2.** a, Comparison of BioFung to available euk90 and euk100 KEGG profiles. Euk90\_v91 and euk100\_v91 are versions of pre-trained hmm for eukaryote database<sup>61,62</sup>. Coverage of BioFung was higher than of available hmm. b, Venn diagram displays the overlap of annotation. The overlap between BioFung vs euk90\_v91, BioFung vs euk100\_v91 and comparison of both eukaryote profiles from all *Candida* gene annotation. BioFung still has an enormous scope of unique KO, and small differences between eukaryote profiles can be observed. c, Validation assessing coverage of the yeast-specific pathway. We performed pathway analysis of KO annotations containing yeast-specific cell pathways. Observation of no yeast specific pathways was found in eukaryote annotation. d, Core and accessory overview of the metabolic pathway across *Aspergillus* strains using BioFUNG. Shared genome refers to features not present in all strains and unique genome features is exhibited by only one *Aspergillus* species denoting accessory functions. e, Coverage of BioFung annotation of *Aspergillus fumigatus* with similar function reportage of living cells. f, Annotation comparison of BioFung and KEGG for *Aspergillus* species. g, Uclust quality assessment by looking at the frequency of cluster numbers at 0.5 cut-offs. The cut-off was inclusive of signature clusters capture and a broad range of core clusters. h, Core percentile coverage of functional annotation. First instance, distribution of KEGG module categories reflect functions seen in most microbiota species. Illustrates the extensive functional capability of *Candida* within each species. i, Core KEGG metabolism exploration in *Candida* species. Amino acid, carbohydrate and lipid metabolism contributes the greatest make up of gene function in *Candida* species. This indicates the contribution of different metabolic potential from *Candida*. j, Intra-strain metabolism analysis of *C. albicans* indicating genome differentiation. k, Clustering of 24 *C. albicans* strains of Carbohydrate Active enzymes demonstrating indistinguishable changes in genome.

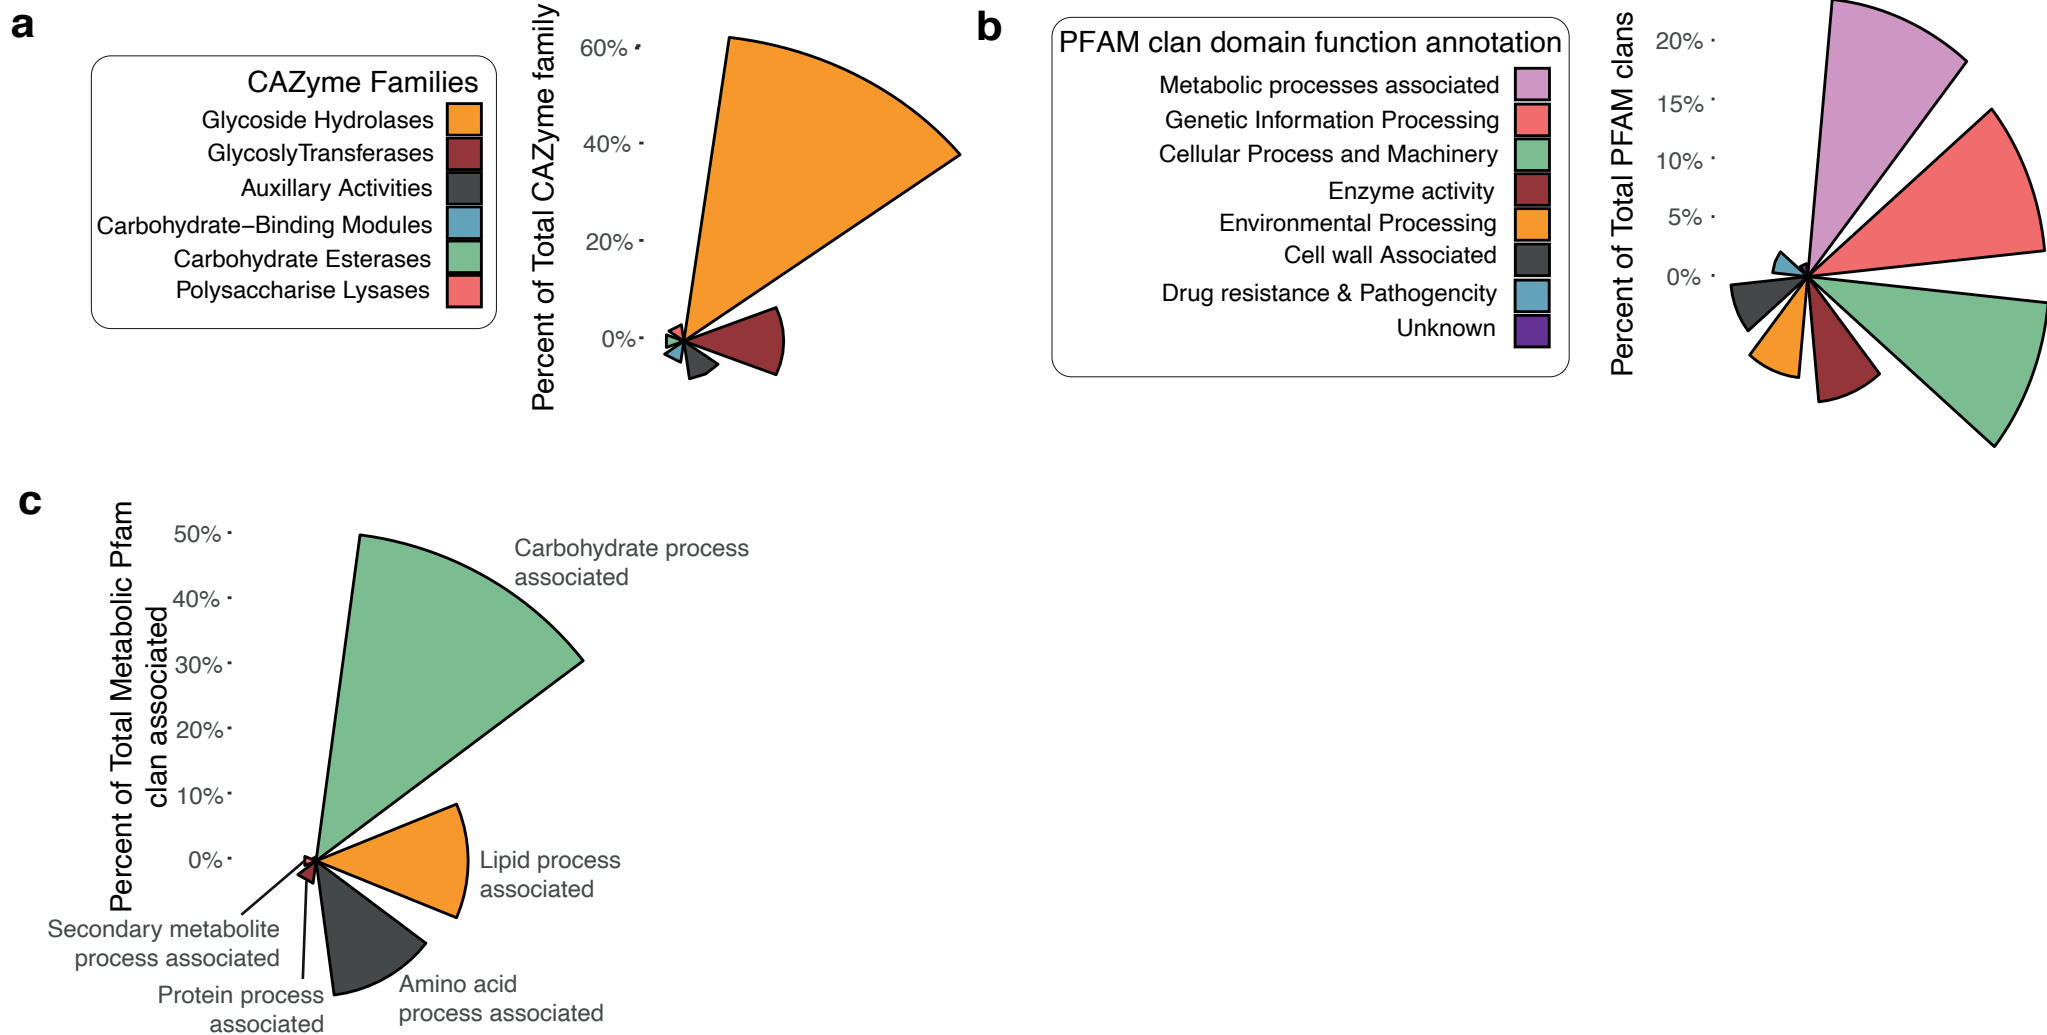

**Supplementary Figure 3** a, Coverage of CAZyme annotation. Glycoside hydrolase family is the largest contributor in all *Candida* species. b, Coverage of Pfam annotation. Pfam coverage indicates that metabolic processes, genetic information processing and cellular process & machinery provide the immense repertoire of protein function in all *Candida* species. c, Core Pfam metabolic process analysis in *Candida* species. Carbohydrate, amino acid, and lipid-associated processes are the largest metabolomic protein function in *Candida* strains.

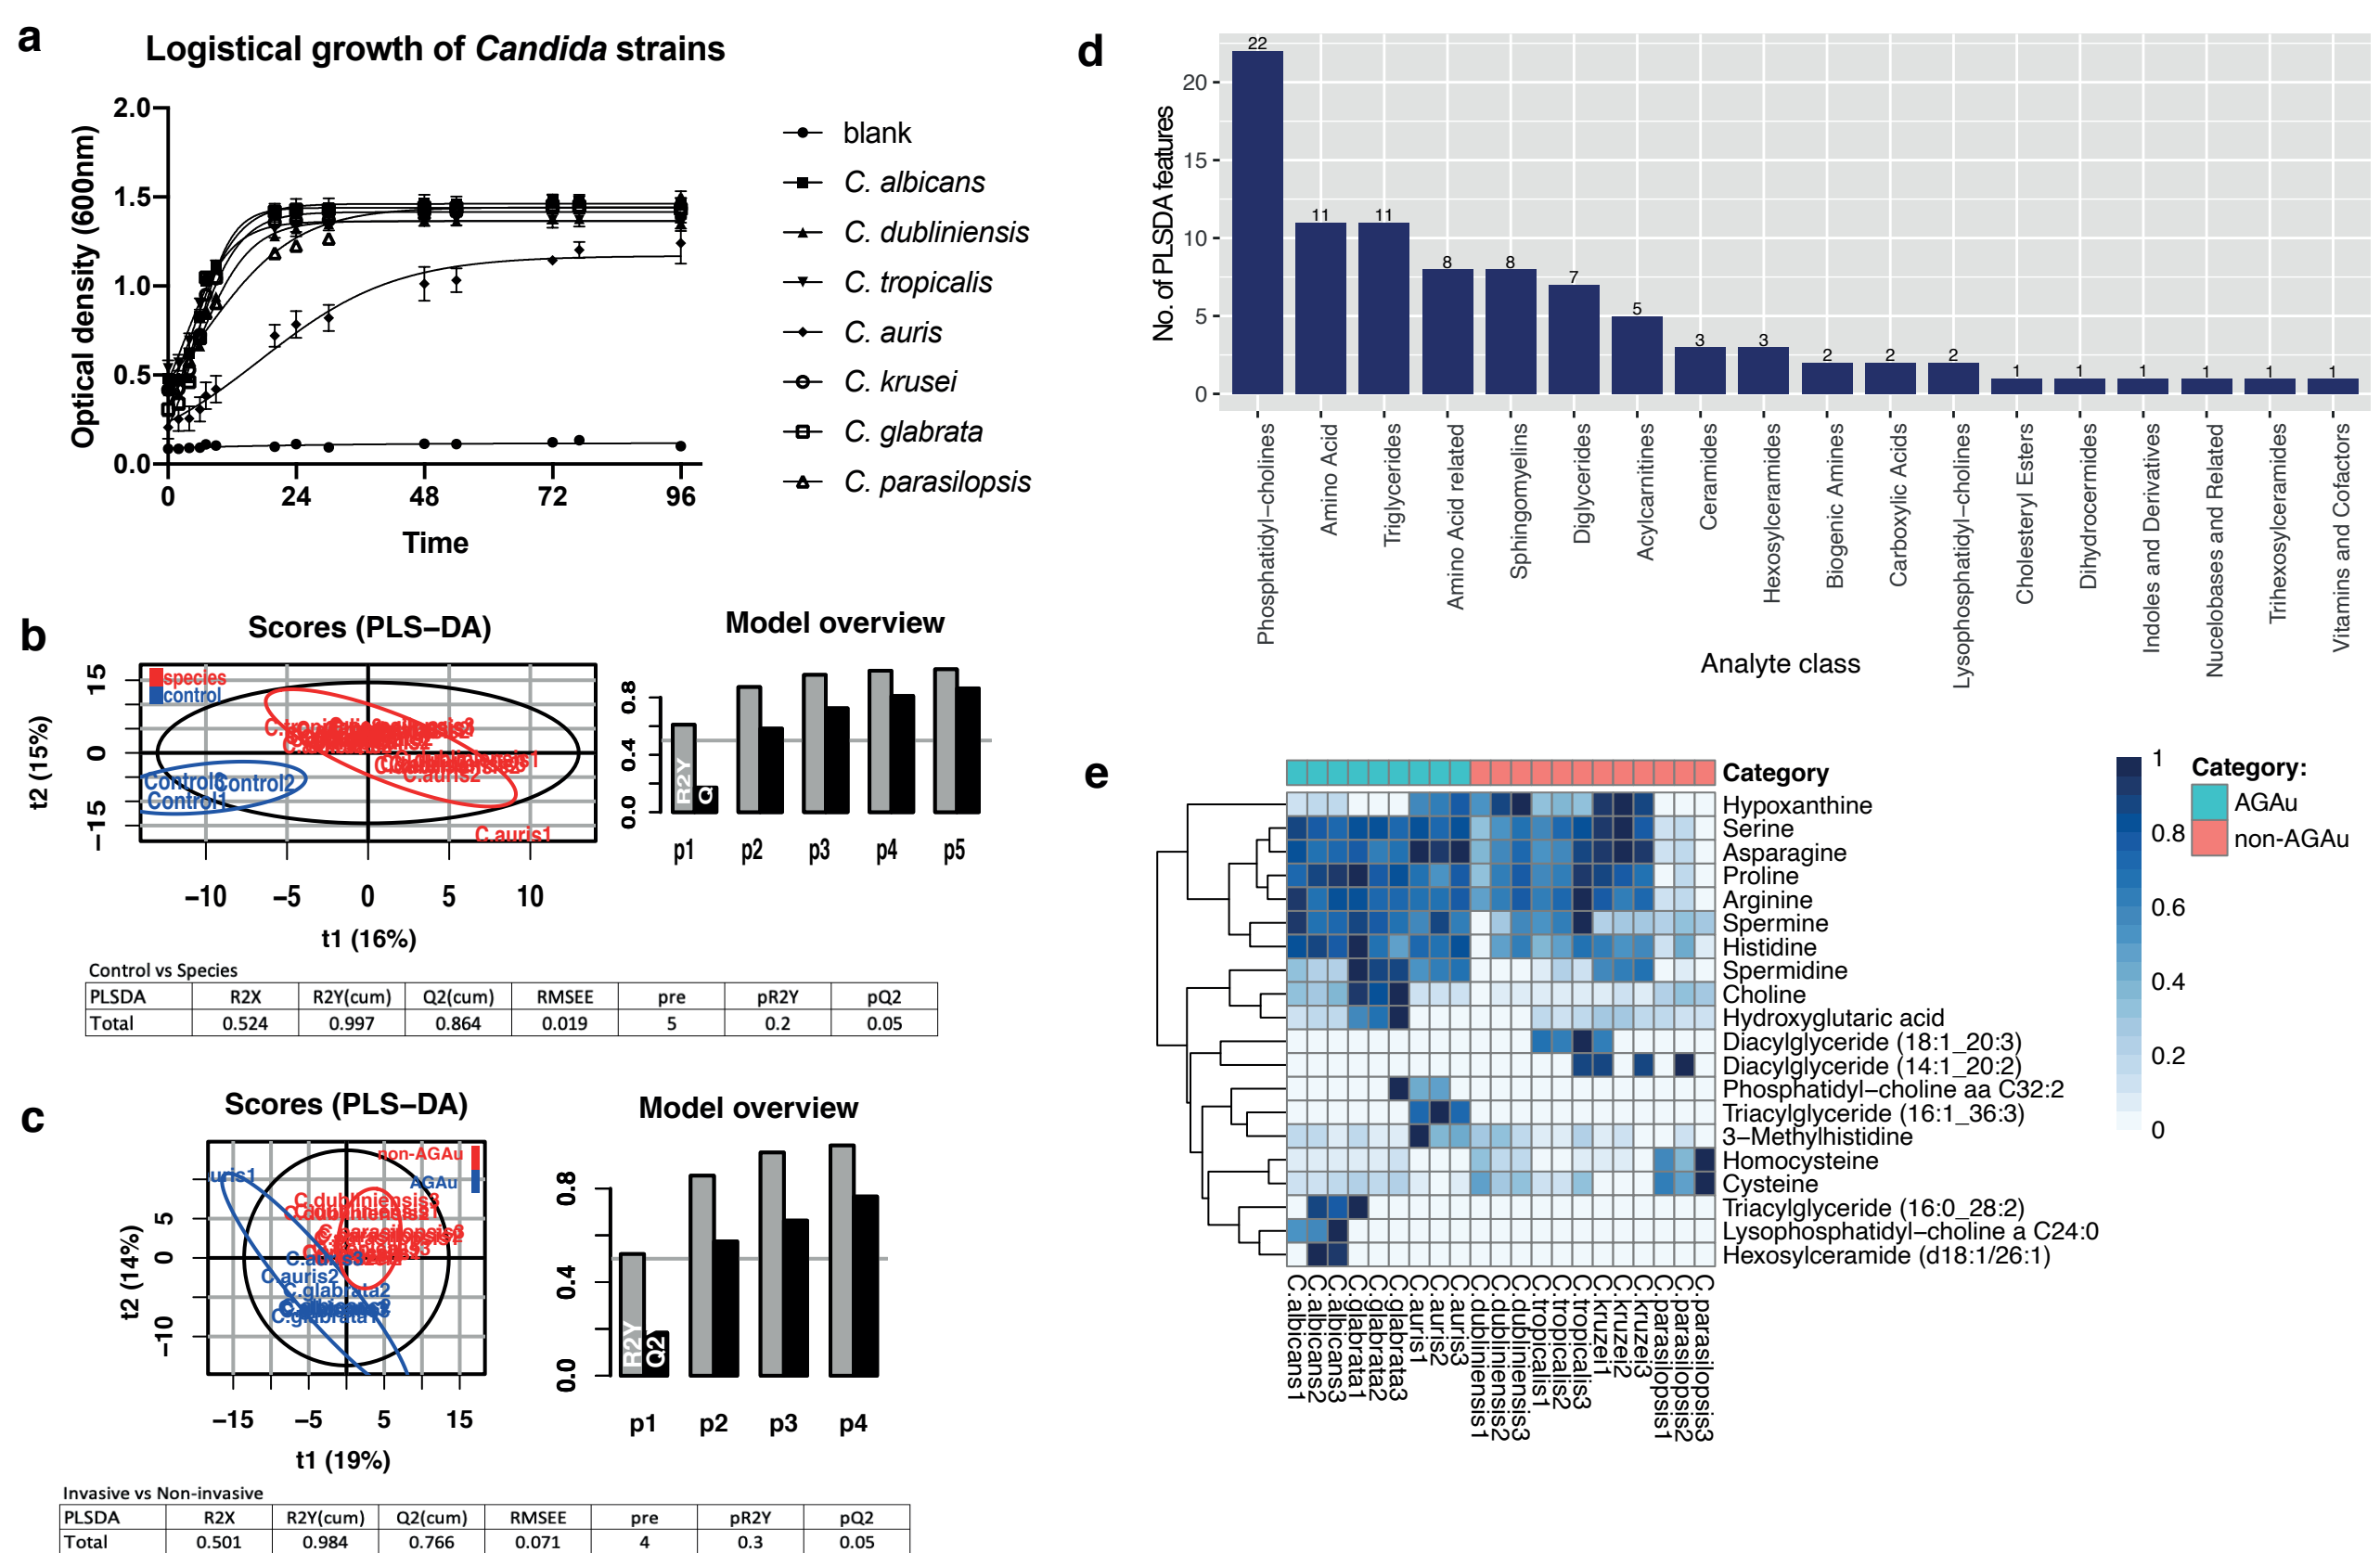

**Supplementary Figure 4 a**, Growth curve of strains grown in the laboratory. All the strains were grown, and timepoint measurement of OD1 at 600nm was taken to obtain the mid-exponential phase (n=3 biologically replicates; error bars indicate (+/-)S.D. of triplicate measurement). **b**, Targeted metabolomics with PLS-DA analysis differentiating from media. PLS-DA score indicated a precise fitting performance of clustering media distinctly from *Candida* strains. **c**, Targeted metabolomics PLS-DA analysis based on AGAu and non-AGAu species. PLS-DA score plot indicated a fitting and predictive performance (2 latent variables,  $R^2X = 0.501$ ,  $R^2Y = 0.984$ ,  $Q^2 = 0.766$ ). **d**, Analyte Class component features in PLS-DA analysis. A significant number of differential components between invasive and non-invasive strains. **e**, Heatmap of significant metabolites. Identified from PLS-DA, top 20 metabolites differentiated in AGAu and non-AGAu based on Wilcoxon rank-sum test ( $P < 0.05$ ).

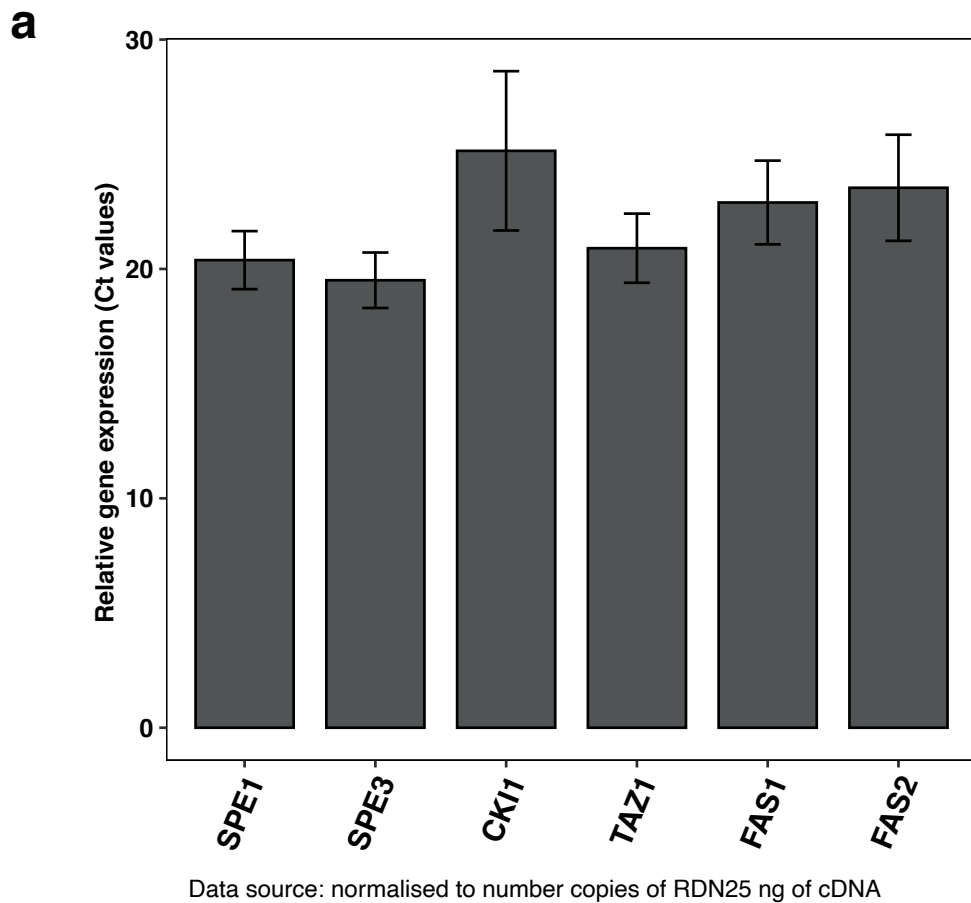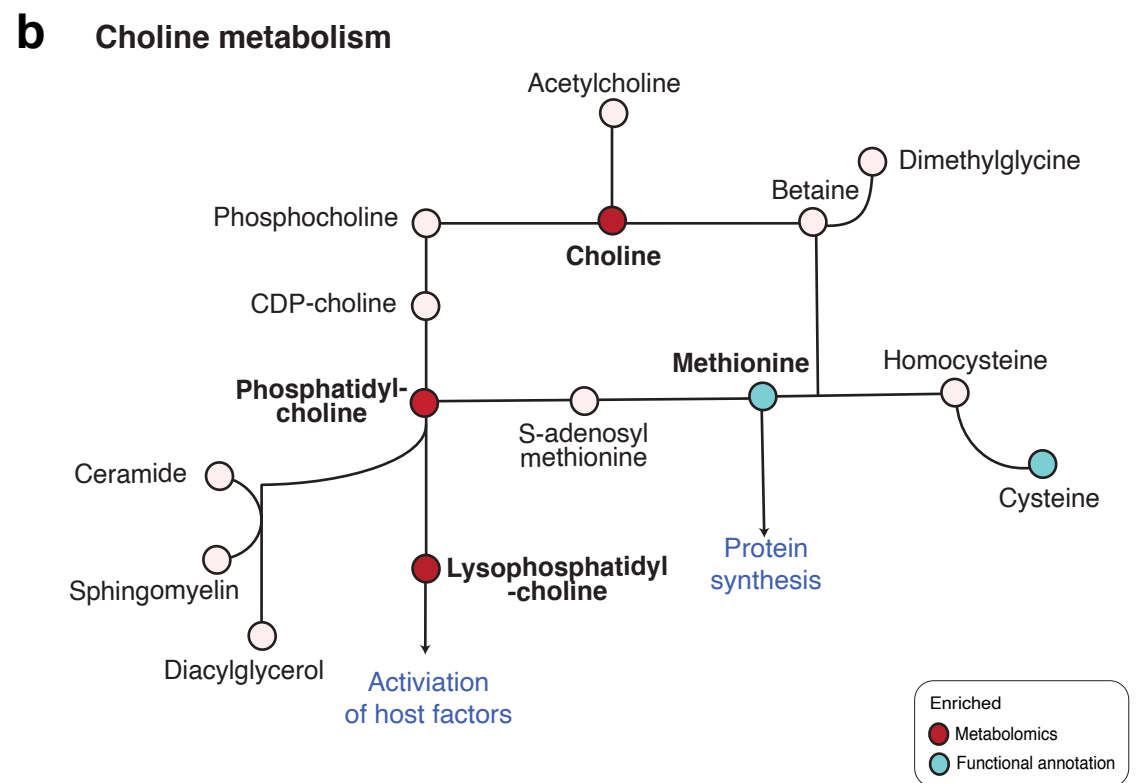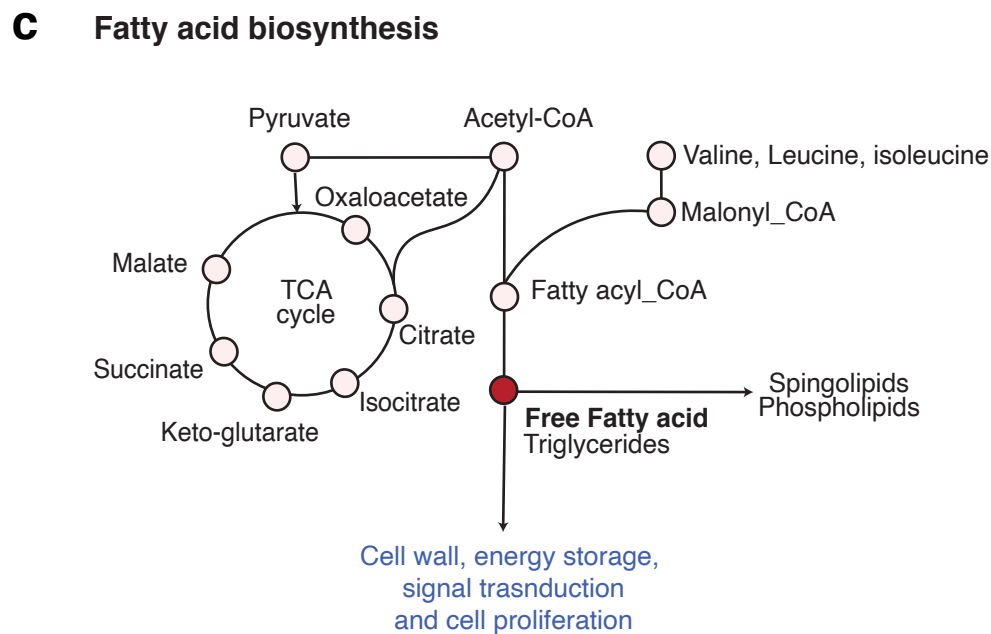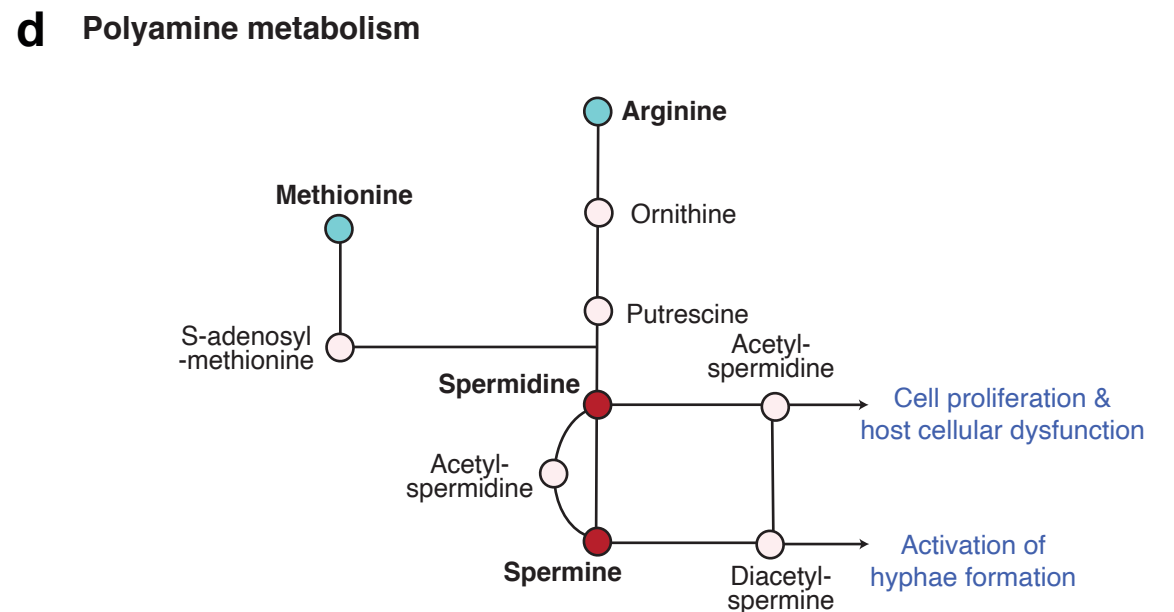

Supplementary Figure 5 a, Quantitative RT-qPCR validation of pathways with *C. albicans*. Indicating pathway genes (SPE1, SPE3, CK1, TAZ1, FAS1, FAS2) compared to their relative expression in *Candida albicans*, representative of AGAu species cluster. (n = 3 biological replicates; display the relative RNA expression level (Ct value); error bars indicate (+/-)S.D. of triplicate measurement). b, Choline metabolic pathway. Concise choline metabolism and its affect. c, Fatty acid metabolism. Concise fatty acid biosynthesis metabolism and its affect. d, Polyamine metabolism. Concise polyamine metabolism and its affect.

**Supplementary Table 1**, Information on database collection of 49 *Candida* strains. In-depth data collection of strain retrieval from a database, including strain id, genome id, sample type, origin country, year of collection, annotation availability.

| No. | Sample name                            | Genome assembly | Genome ID            | ENA ID      | Biosample ID | Strain  | Sequencing platform                             | Included as Refseq | Year        | Origin       | Sample type                | Annotations available | Reference ID:       |
|-----|----------------------------------------|-----------------|----------------------|-------------|--------------|---------|-------------------------------------------------|--------------------|-------------|--------------|----------------------------|-----------------------|---------------------|
| 1   | candida_auris_gca_001189475            | gca_001189475   | ASM118947v1          | PRJNA267757 | SAMN03200169 | 6684    | Illumina HiSeq;<br>Illumina MiSeq               | 3464668            | 2015        | India        | Urine                      | P,U                   | PMID: 26346253      |
| 2   | candida_auris_gca_002759435            | gca_002759435   | Cand_auris_B8441_V2  | PRJNA328792 | SAMN05379624 | B8441   | PacBio                                          | N/A                | 2017        | Pakistan     | Urine/blood                | no results            | PMID: 27988485      |
| 3   | candida_auris_gca_002775015            | gca_002775015   | Cand_auris_B11221_V1 | PRJNA328792 | SAMN05379609 | B11221  | PacBio                                          | 9493448            | 2017        | South Africa | patient (unknown location) | no results            | PMID: 27988485      |
| 4   | candida_auris_gca_003013715            | gca_003013715   | Cand_auris_B11220    | PRJNA328792 | SAMN05379608 | B11220  | PacBio                                          | N/A                | 2017        | Japan        | Ear                        | no results            | PMID: 27988485      |
| 5   | candida_auris_gca_003014415            | gca_003014415   | Cand_auris_B11243    | PRJNA328792 | SAMN05379619 | B11243  | Illumina                                        | N/A                | 2018        | Venezuela    | blood                      | no results            | PMID: 30559369      |
| 6   | candida_duobushaemulonis_gca_002926085 | gca_002926085   | CanDuoHae_v1.0       | PRJNA421966 | SAMN08161465 | B09383  | PacBio                                          | 8186598            | 2018        | USA          | foot ulcer                 | no results            | PMID: 30559369      |
| 7   | candida_glabrata_gca_000002545         | gca_000002545   | ASM254v2             | PRJNA13831  | SAMEA3138172 | CBS 138 | 3700 Genetic Analyser/Licor 4200L DNA sequencer | 354578             | 2002        | Unknown      | faecal                     | K,P,E,KO,U            | PMID: 12527359      |
| 8   | candida_glabrata_gca_001466525         | gca_001466525   | ASM146652v1          | PRJNA297263 | SAMN04121073 | 1A      | Illumina MiSeq                                  | N/A                | 2015        | Norway       | blood                      | P,U                   | WGS Project: LLW001 |
| 9   | candida_glabrata_gca_001466535         | gca_001466535   | ASM146653v1          | PRJNA297263 | SAMN04121074 | 1B      | Illumina MiSeq                                  | N/A                | 2015        | Norway       | blood                      | K,P,E,KO,U            | WGS Project: LMAA01 |
| 10  | candida_glabrata_gca_001466565         | gca_001466565   | ASM146656v1          | PRJNA297263 | SAMN04121078 | 3B      | Illumina MiSeq                                  | N/A                | 2015        | Norway       | blood                      | K,P,E,U               | WGS Project: LMAB01 |
| 11  | candida_glabrata_gca_001466575         | gca_001466575   | ASM146657v1          | PRJNA297263 | SAMN04121076 | 2B      | Illumina MiSeq                                  | N/A                | 2015        | Norway       | blood                      | P,U                   | WGS Project: LLZY01 |
| 12  | candida_glabrata_gca_001466635         | gca_001466635   | ASM146663v1          | PRJNA297263 | SAMN04121075 | 2A      | Illumina MiSeq                                  | N/A                | 2015        | Norway       | blood                      | P,U                   | WGS Project: LLZZ01 |
| 13  | candida_glabrata_gca_001466685         | gca_001466685   | ASM146668v1          | PRJNA297263 | SAMN04121077 | 3A      | Illumina MiSeq                                  | N/A                | 2015        | Norway       | blood                      | P,U                   | WGS Project: LMAY01 |
| 14  | candida_glabrata_gca_002219185         | gca_002219185   | ASM221918v1          | PRJNA374542 | SAMN06328411 | DSY562  | PacBio                                          | N/A                | 2014 (1995) | Switzerland  | Oral                       | no results            | PMID: 28663342      |

|    |                                         |               |                              |             |              |            |                                             |         |             |              |                            |            |                     |
|----|-----------------------------------------|---------------|------------------------------|-------------|--------------|------------|---------------------------------------------|---------|-------------|--------------|----------------------------|------------|---------------------|
| 15 | candida_glabrata_gca_002219195          | gca_002219195 | ASM221919v1                  | PRJNA374542 | SAMN06328412 | DSY565     | PacBio                                      | N/A     | 2015 (1995) | Switzerland  | Oral                       | no results | PMID: 28663342      |
| 16 | candida_haemulonii_gca_002926055        | gca_002926055 | CanHae_1.0                   | PRJNA421961 | SAMN08161437 | B11899     | PacBio                                      | 9255618 | 2018        | Israel       | leg ulcer                  | no results | PMID: 30559369      |
| 17 | candida_intermedia_gca_900106115        | gca_900106115 | CBS 141442 assembly          | PRJEB14359  | SAMEA4029010 | CBS 141442 | single-molecule real-time (SMRT) sequencing |         | 2016        | Sweden       | wheat                      | P,U        | PMID: 28385851      |
| 18 | candida_intermedia_gca_900106125        | gca_900106125 | PYCC 4715 assembly           | PRJEB14359  | SAMEA4029009 | PYCC 4715  | single-molecule real-time (SMRT) sequencing |         | 2016        | Sweden       | sewage in Portugal         | P,U        | PMID: 28385851      |
| 19 | candida_pseudohaemulonii_gca_003013735  | gca_003013735 | Cand_pseudohaemulonii_B12108 | PRJNA438484 | SAMN08714088 | B12108     | Illumina                                    | 6426098 | 2015        | Venezuela    | patient (unknown location) | no results | PMID: 30559369      |
| 20 | candida_tenuis_atcc_10573_gca_000223465 | gca_000223465 | Candida tenuis v1.0          | PRJNA33673  | SAMN00715317 | ATCC 10573 | 454; Sanger                                 | 895348  | 2011        | USA          | trees, roots and beetles   | K,P,KO,U   | PMID: 21788494      |
| 21 | candida_albicans_12c_gca_000773845      | gca_000773845 | Cand_albi_12C_V2             | PRJNA75209  | SAMN00767974 | 12C        | Illumina                                    | N/A     | 2014        | USA          | vaginal                    | no results | WGS Project: AJIQ01 |
| 22 | candida_albicans_19f_gca_000775445      | gca_000775445 | Cand_albi_19F_V2             | PRJNA75221  | SAMN01048008 | 19F        | Illumina                                    | N/A     | 2014        | USA          | vaginal                    | no results | WGS Project: AJIV01 |
| 23 | candida_albicans_ca6_gca_000784695      | gca_000784695 | Cand_albi_Ca6_V2             | PRJNA120431 | SAMN03164130 | Ca6        | Illumina                                    | N/A     | 2014        | Sweden       | blood                      | no results | WGS Project: AJJG01 |
| 24 | candida_albicans_gc75_gca_000773735     | gca_000773735 | Cand_albi_GC75_V1            | PRJNA75223  | SAMN00767984 | GC75       | Illumina                                    | N/A     | 2014        | South Africa | oral (healthy)             | no results | WGS Project: AJIW01 |
| 25 | candida_albicans_l26_gca_000775455      | gca_000775455 | Cand_albi_L26_V2             | PRJNA75211  | SAMN01048004 | L26        | Illumina                                    | N/A     | 2014        | USA          | vaginal                    | no results | WGS Project: AJIR01 |
| 26 | candida_albicans_p34048_gca_000775465   | gca_000775465 | Cand_albi_P34048_V1          | PRJNA75229  | SAMN01048010 | P34048     | Illumina                                    | N/A     | 2014        | Turkey       | blood                      | no results | WGS Project: AJIZ01 |
| 27 | candida_albicans_p37005_gca_000773745   | gca_000773745 | Cand_albi_P37005_V2          | PRJNA75217  | SAMN01048006 | P37005     | Illumina                                    | N/A     | 2014        | USA          | oral (healthy)             | no results | WGS Project: AJIU01 |
| 28 | candida_albicans_p37037_gca_000773825   | gca_000773825 | Cand_albi_P37037_V1          | PRJNA75231  | SAMN01048011 | P37037     | Illumina                                    | N/A     | 2014        | USA          | oral (healthy)             | no results | WGS Project: AJJA01 |
| 29 | candida_albicans_p37039_gca_000784515   | gca_000784515 | Cand_albi_P37039_V1          | PRJNA75233  | SAMN00767975 | P37039     | Illumina                                    | N/A     | 2014        | USA          | blood                      | no results | WGS Project: JSXQ01 |
| 30 | candida_albicans_p57055_gca_000775505   | gca_000775505 | Cand_albi_P57055_V1          | PRJNA75239  | SAMN01048013 | P57055     | Illumina                                    | N/A     | 2014        | USA          | blood                      | no results | WGS Project: AJJB01 |

|    |                                                       |               |                     |             |              |              |                       |        |            |              |                                        |            |                     |
|----|-------------------------------------------------------|---------------|---------------------|-------------|--------------|--------------|-----------------------|--------|------------|--------------|----------------------------------------|------------|---------------------|
| 31 | candida_albicans_p57072_gca_000773805                 | gca_000773805 | Cand_albi_P57072_V1 | PRJNA75227  | SAMN00767978 | P57072       | Illumina              | N/A    | 2014       | USA          | blood                                  | no results | WGS Project: AJIY01 |
| 32 | candida_albicans_p60002_gca_000784525                 | gca_000784525 | Cand_albi_P60002_V1 | PRJNA75219  | SAMN01048007 | P60002       | Illumina              | N/A    | 2014       | USA          | blood                                  | no results | WGS Project: JSXP01 |
| 33 | candida_albicans_p75010_gca_000784575                 | gca_000784575 | Cand_albi_P75010_V1 | PRJNA75235  | SAMN00769059 | P75010       | Illumina              | N/A    | 2014       | Belgium      | blood                                  | no results | WGS Project: JSXR01 |
| 34 | candida_albicans_p75016_gca_000784595                 | gca_000784595 | Cand_albi_P75016_V1 | PRJNA75237  | SAMN01048012 | P75016       | Illumina              | N/A    | 2014       | Israel       | blood                                  | no results | WGS Project: JPEV01 |
| 35 | candida_albicans_p75063_gca_000775525                 | gca_000775525 | Cand_albi_P75063_V1 | PRJNA75241  | SAMN01048014 | P75063       | Illumina              | N/A    | 2014       | France       | blood                                  | no results | WGS Project: AJJC01 |
| 36 | candida_albicans_p76055_gca_000784505                 | gca_000784505 | Cand_albi_P76055_V1 | PRJNA75243  | SAMN01048016 | P76055       | Illumina              | N/A    | 2014       | USA          | blood                                  | no results | WGS Project: AJJD01 |
| 37 | candida_albicans_p76067_gca_000784495                 | gca_000784495 | Cand_albi_P76067_V1 | PRJNA75245  | SAMN01048017 | P76067       | Illumina              | N/A    | 2014       | Canada       | blood                                  | no results | WGS Project: AJJE01 |
| 38 | candida_albicans_p78042_gca_000784615                 | gca_000784615 | Cand_albi_P78042_V1 | PRJNA75247  | SAMN01048015 | P78042       | Illumina              | N/A    | 2014       | USA          | blood                                  | no results | WGS Project: JPEW01 |
| 39 | candida_albicans_p78048_gca_000773725                 | gca_000773725 | Cand_albi_P78048_V1 | PRJNA75225  | SAMN01048009 | P78048       | Illumina              | N/A    | 2014       | Canada       | blood                                  | no results | WGS Project: AJIX01 |
| 40 | candida_albicans_p87_gca_000774085                    | gca_000774085 | Cand_albi_P87_V2    | PRJNA75215  | SAMN00767982 | P87          | Illumina              | N/A    | 2014       | South Africa | oral/vaginal                           | no results | WGS Project: AJIT01 |
| 41 | candida_albicans_p94015_gca_000773755                 | gca_000773755 | Cand_albi_P94015_V1 | PRJNA75213  | SAMN01048005 | P94015       | Illumina              | N/A    | 2014       | USA          | blood                                  | no results | WGS Project: AJIS01 |
| 42 | candida_albicans_sc5314_gca_000784635                 | gca_000784635 | Cand_albi_SC5314_V4 | PRJNA120009 | SAMN01041717 | SC5314       | Illumina              | N/A    | 2014       | USA          | Patient (unknown location)             | K,P,KO,U   | PMID: 15239821      |
| 43 | candida_albicans_sc5314_gca_000784655                 | gca_000784655 | Cand_albi_SC5314_V3 | PRJNA191536 | SAMN01041717 | SC5314       | Illumina              | N/A    | 2014       | USA          | Patient (unknown location)             | K,P,KO,U   | PMID: 15239821      |
| 44 | candida_albicans_wo_1_gca_000149445                   | gca_000149445 | ASM14944v2          | PRJNA16373  | SAMN02953609 | WO-1         | ABI/Sanger technology | N/A    | 2009(1986) | USA          | blood                                  | P,U        | PMID: 19465905      |
| 45 | candida_arabinofermentans_nr_rl_yb_2248_gca_001661425 | gca_001661425 | Canar1              | PRJNA207879 | SAMN00794644 | NRRL YB-2248 | Illumina              | N/A    | 2016(1998) | USA          | unidentified wood boring insect larvae | P,U        | PMID: 27535936      |
| 46 | candida_dublinsiensis_cd36_gca_000026945              | gca_000026945 | ASM2694v1           | PRJEA34697  | SAMEA2272258 | CD36         | Sanger                | 101528 | 2009(1995) | Ireland      | oral                                   | P,E,K,KO,U | PMID: 19745113      |



|    |                                               |               |              |             |              |           |                         |         |            |                             |                      |            |                |
|----|-----------------------------------------------|---------------|--------------|-------------|--------------|-----------|-------------------------|---------|------------|-----------------------------|----------------------|------------|----------------|
| 47 | candida_maltosa_xu316_gca_000344705           | gca_000344705 | Cmaltosa_v01 | PRJNA184737 | SAMN02981501 | Xu316     | Illumina HiSeq          | N/A     | 2013(2010) | China                       | Laboratory (Unknown) | no results | PMID: 20668703 |
| 48 | candida_orthopsilosis_co_90_125_gca_000315875 | gca_000315875 | ASM31587v1   | PRJEA83665  | SAMEA2272376 | Co 90-125 | Roche GS FLX instrument | 1011928 | 2012(1928) | Puerto Rico (Latin America) | diarrhea(blood)      | K,P,KO,U   | PMID: 22563396 |
| 49 | candida_tropicalis_my_3404_gca_000006335      | gca_000006335 | ASM633v3     | PRJNA13675  | SAMN02953608 | MYA-3404  | ABI                     | 6369408 | 2009(1994) | Holland                     | blood                | K,P,E,KO,U | PMID: 19465905 |

\* annotation column abbreviation expansion: K=KEGG genome annotation;C= ;P=PFAM annotation;E=eggnog annotation; KO=kegg ortholog (Phylogenomic); Z= CAZyme annotation; U=Uniprot annotation.

**Supplementary Table 2**, AGAu strain categorisation. Based on sample names, grouping, location of sample extraction and reference for strain.

| No. | Sample name                             | Cluster species | Location of sample extraction | Reference                          |
|-----|-----------------------------------------|-----------------|-------------------------------|------------------------------------|
| 1   | candida_auris_gca_001189475             | AGAu            | Urine                         | DOI: 10.1186/s12864-015-1863-z     |
| 2   | candida_auris_gca_002759435             | AGAu            | Urine/blood                   | DOI: 10.1093/cid/ciw691            |
| 3   | candida_auris_gca_002775015             | AGAu            | patient (unknown location)    | DOI: 10.1093/cid/ciw691            |
| 4   | candida_auris_gca_003013715             | AGAu            | Ear                           | DOI: 10.1093/cid/ciw691            |
| 5   | candida_auris_gca_003014415             | AGAu            | blood                         | DOI: 10.1038/s41467-018-07779-6    |
| 6   | candida_duobushaemulonius_gca_002926085 | Non-AGAu        | foot ulcer                    | DOI: 10.1038/s41467-018-07779-6    |
| 7   | candida_glabrata_gca_000002545          | AGAu            | faecal                        | DOI: 10.1016/s0014-5793(02)03749-3 |
| 8   | candida_glabrata_gca_001466525          | AGAu            | blood                         | DOI: 10.1128/CMR.12.1.80           |
| 9   | candida_glabrata_gca_001466535          | AGAu            | blood                         | DOI: 10.1128/CMR.12.1.80           |
| 10  | candida_glabrata_gca_001466565          | AGAu            | blood                         | DOI: 10.1128/CMR.12.1.80           |
| 11  | candida_glabrata_gca_001466575          | AGAu            | blood                         | DOI: 10.1128/CMR.12.1.80           |
| 12  | candida_glabrata_gca_001466635          | AGAu            | blood                         | DOI: 10.1128/CMR.12.1.80           |
| 13  | candida_glabrata_gca_001466685          | AGAu            | blood                         | DOI: 10.1128/CMR.12.1.80           |
| 14  | candida_glabrata_gca_002219185          | AGAu            | Oral                          | DOI: 10.1534/g3.117.042887         |
| 15  | candida_glabrata_gca_002219195          | AGAu            | Oral                          | DOI: 10.1534/g3.117.042887         |
| 16  | candida_haemulonius_gca_002926055       | Non-AGAu        | leg ulcer                     | DOI: 10.1038/s41467-018-07779-6    |
| 17  | candida_intermedia_gca_900106115        | Non-AGAu        | wheat                         | DOI: 10.1128/genomeA.00138-17      |
| 18  | candida_intermedia_gca_900106125        | Non-AGAu        | sewage in Portugal            | DOI: 10.1128/genomeA.00138-17      |
| 19  | candida_pseudohaemulonius_gca_003013735 | Non-AGAu        | patient (unknown location)    | DOI: 10.1038/s41467-018-07779-6    |
| 20  | candida_tenuis_atcc_10573_gca_000223465 | Non-AGAu        | trees, roots and beetles      | DOI: 10.1073/pnas.1103039108       |
| 21  | candida_albicans_12c_gca_000773845      | AGAu            | vaginal                       | DOI: 10.1534/genetics.104.033167   |
| 22  | candida_albicans_19f_gca_000775445      | AGAu            | vaginal                       | DOI: 10.1534/genetics.104.033167   |
| 23  | candida_albicans_ca6_gca_000784695      | AGAu            | blood                         | DOI: 10.1534/genetics.104.033167   |
| 24  | candida_albicans_gc75_gca_000773735     | AGAu            | oral (healthy)                | DOI: 10.1534/genetics.104.033167   |
| 25  | candida_albicans_l26_gca_000775455      | AGAu            | vaginal                       | DOI: 10.1534/genetics.104.033167   |
| 26  | candida_albicans_p34048_gca_000775465   | AGAu            | blood                         | DOI: 10.1534/genetics.104.033167   |
| 27  | candida_albicans_p37005_gca_000773745   | AGAu            | oral (healthy)                | DOI: 10.1534/genetics.104.033167   |
| 28  | candida_albicans_p37037_gca_000773825   | AGAu            | oral (healthy)                | DOI: 10.1534/genetics.104.033167   |
| 29  | candida_albicans_p37039_gca_000784515   | AGAu            | blood                         | DOI: 10.1534/genetics.104.033167   |
| 30  | candida_albicans_p57055_gca_000775505   | AGAu            | blood                         | DOI: 10.1534/genetics.104.033167   |
| 31  | candida_albicans_p57072_gca_000773805   | AGAu            | blood                         | DOI: 10.1534/genetics.104.033167   |
| 32  | candida_albicans_p60002_gca_000784525   | AGAu            | blood                         | DOI: 10.1534/genetics.104.033167   |
| 33  | candida_albicans_p75010_gca_000784575   | AGAu            | blood                         | DOI: 10.1534/genetics.104.033167   |
| 34  | candida_albicans_p75016_gca_000784595   | AGAu            | blood                         | DOI: 10.1534/genetics.104.033167   |
| 35  | candida_albicans_p75063_gca_000775525   | AGAu            | blood                         | DOI: 10.1534/genetics.104.033167   |

|    |                                                      |          |                                        |                                       |
|----|------------------------------------------------------|----------|----------------------------------------|---------------------------------------|
| 36 | candida_albicans_p76055_gca_000784505                | AGAu     | blood                                  | DOI: 10.1128/mBio.01205-18            |
| 37 | candida_albicans_p76067_gca_000784495                | AGAu     | blood                                  | DOI: 10.1534/genetics.104.033167      |
| 38 | candida_albicans_p78042_gca_000784615                | AGAu     | blood                                  | DOI: 10.1128/mBio.01205-18            |
| 39 | candida_albicans_p78048_gca_000773725                | AGAu     | blood                                  | DOI: 10.1534/genetics.104.033167      |
| 40 | candida_albicans_p87_gca_000774085                   | AGAu     | oral/vaginal                           | DOI: 10.1128/mBio.01205-18            |
| 41 | candida_albicans_p94015_gca_000773755                | AGAu     | blood                                  | DOI: 10.1101/gr.174623.114            |
| 42 | candida_albicans_sc5314_gca_000784635                | AGAu     | Patient (unknown location)             | DOI: 10.1186/gb-2004-5-7-230          |
| 43 | candida_albicans_sc5314_gca_000784655                | AGAu     | Patient (unknown location)             | DOI: 10.1186/gb-2004-5-7-230          |
| 44 | candida_albicans_wo_1_gca_000149445                  | AGAu     | blood                                  | DOI: 10.1101/gr.174623.114            |
| 45 | candida_arabinofermentans_nrr1_yb_2248_gca_001661425 | Non-AGAu | unidentified wood boring insect larvae | DOI: 10.1023/a:1001799607871          |
| 46 | candida_dublinsiensis_cd36_gca_000026945             | Non-AGAu | oral                                   | DOI: 10.1099/00221287-144-4-829       |
| 47 | candida_maltosa_xu316_gca_000344705                  | Non-AGAu | Laboratory (Unknown)                   | DOI: 10.1111/j.1365-2672.2006.02915.x |
| 48 | candida_orthopsilosis_co_90_125_gca_000315875        | Non-AGAu | diarrhea(blood)                        | DOI: 10.1371/journal.pone.0035750     |
| 49 | candida_tropicalis_myra_3404_gca_000006335           | Non-AGAu | blood                                  | DOI: 10.1038/nature08064              |

**Supplementary Table 3**, Significant of functional annotation in enriched or depleted in AGAu group. Some annotations are statistically significant with the odds ratio of falling within the scale of 0 and 1. They have not been included in the figure but remain relevant. These have been captured in this table for CAZyme, KO and Pfam.

| Cazyme | Cell wall substrate conversion | Reference for cazyme assay                                                                                                                                                                                                                                     | Reference fungal cell wall                                   |
|--------|--------------------------------|----------------------------------------------------------------------------------------------------------------------------------------------------------------------------------------------------------------------------------------------------------------|--------------------------------------------------------------|
| CBM43  | Glucan                         | DOI: 10.1128/EC.00107-10                                                                                                                                                                                                                                       | DOI: 10.1074/jbc.M807990200                                  |
| GH1    | Glucan                         | DOI: 10.1093/database/bar020                                                                                                                                                                                                                                   | DOI: 10.1186/1471-2164-15-6                                  |
| GH109  | Glucan                         | DOI: 10.1038/nbt1298                                                                                                                                                                                                                                           | DOI: 10.1016/j.celrep.2019.02.090                            |
| GH13   | Glucan                         | DOI: 10.1007/s10930-010-9260-6                                                                                                                                                                                                                                 | DOI: 10.1186/1471-2164-15-6                                  |
| GH16   | Glucan                         | DOI: 10.1111/cmi.12630                                                                                                                                                                                                                                         | DOI: 10.1186/1471-2164-15-6                                  |
| GH17   | Glucan                         | DOI: 10.3390/jof4010018                                                                                                                                                                                                                                        | DOI: 10.1186/1471-2164-15-6                                  |
| GH2    | Chitin/Glucan                  | Withers, S., "Glycoside Hydrolase Family 2" in <i>CAZypedia</i> , available at URL <a href="https://www.cazypedia.org/index.php/Glycoside_Hydrolase_Family_2">https://www.cazypedia.org/index.php/Glycoside_Hydrolase_Family_2</a> , accessed 7 February 2021. | DOI: 10.1186/1471-2164-15-6                                  |
| GH27   | Glucan                         | DOI: 10.1093/glycob/cwq105                                                                                                                                                                                                                                     | DOI: 10.1186/1471-2164-15-6                                  |
| GH3    | Glucan                         | DOI: 10.1038/s41598-020-58015-5                                                                                                                                                                                                                                | DOI: 10.1186/1471-2164-15-6                                  |
| GH39   | Glucan                         | DOI: 10.1074/jbc.M117.789008                                                                                                                                                                                                                                   | DOI: 10.1186/1471-2164-15-6                                  |
| GH5    | Glucan                         | DOI: 10.1128/EC.00187-10                                                                                                                                                                                                                                       | DOI: 10.1186/1471-2164-15-6                                  |
| GH51   | Glucan                         | DOI: 10.1074/jbc.M117.789008                                                                                                                                                                                                                                   | DOI: 10.1186/1471-2164-15-6                                  |
| GH72   | Glucan                         | DOI: 10.1042/BJ20110405                                                                                                                                                                                                                                        | DOI: 10.1186/1471-2164-15-6                                  |
| GH74   | Glucan                         | DOI: 10.1016/S2095-3119(20)63254-3                                                                                                                                                                                                                             | DOI: 10.1186/1471-2164-15-6; DOI: 10.1007/s00253-019-09983-w |
| GH81   | Glucan                         | DOI: 10.1111/cmi.12630                                                                                                                                                                                                                                         | DOI: 10.1186/1471-2164-15-6                                  |
| GH9    | Glucan                         | DOI: 10.1126/science.1244273                                                                                                                                                                                                                                   | DOI: 10.1104/pp.105.072652                                   |
| GT57   | Glucan                         | DOI: 10.3390/foods8100452                                                                                                                                                                                                                                      | DOI: 10.1111/tpj.14417; DOI: 10.3390/jof4010006              |
| GT66   | Glucan                         | DOI: 10.1074/jbc.M111.339036                                                                                                                                                                                                                                   | DOI: 10.1111/tpj.14417; DOI: 10.1099/mic.0.067967-0          |
| CE1    | Pectin                         | DOI: 10.1016/j.biori.2017.02.001                                                                                                                                                                                                                               | DOI: 10.1186/1471-2164-15-785                                |
| CE12   | Pectin                         | DOI: 10.1186/s13068-016-0518-x                                                                                                                                                                                                                                 | DOI: 10.1186/1471-2164-15-785                                |
| GH105  | Pectin                         | DOI: 10.1128/AEM.02114-18                                                                                                                                                                                                                                      | DOI: 10.1186/1471-2164-15-6                                  |
| GH43   | Pectin                         | DOI: 10.1186/1471-2164-13-321                                                                                                                                                                                                                                  | DOI: 10.1186/1471-2164-15-6                                  |
| GH78   | Pectin                         | DOI: 10.1128/AEM.00895-19                                                                                                                                                                                                                                      | DOI: 10.1186/1471-2164-15-6                                  |

|                    |                  |                                                                                                                                                                                             |                                                              |
|--------------------|------------------|---------------------------------------------------------------------------------------------------------------------------------------------------------------------------------------------|--------------------------------------------------------------|
| GH88               | Pectin           | DOI: 10.3389/fmicb.2019.00649                                                                                                                                                               | DOI: 10.1186/1471-2164-15-6                                  |
| GH92               | Pectin           | DOI: 10.1111/j.1574-6941.2012.01381.x                                                                                                                                                       | DOI: 10.1016/j.celrep.2019.02.090                            |
| GH93               | Pectin           | DOI: 10.1073/pnas.1701130114                                                                                                                                                                | DOI: 10.1186/1471-2164-15-6                                  |
| GT32               | Pectin           | DOI: 10.1186/1471-2180-11-198                                                                                                                                                               | DOI: 10.1016/j.celrep.2019.02.090                            |
| GT83               | Pectin           | DOI: 10.1016/j.jbiotec.2019.10.011                                                                                                                                                          | DOI: 10.1186/1471-2164-15-6                                  |
| PL10               | Pectin           | DOI: 10.1111/j.1574-6941.2012.01381.x                                                                                                                                                       | DOI: 10.1186/1471-2164-15-9                                  |
| PL4                | Pectin           | DOI: 10.1111/tpj.14417                                                                                                                                                                      | DOI: 10.1186/1471-2164-15-6                                  |
| PL4_1              | Pectin           | DOI: 10.1007/s10295-018-2098-1                                                                                                                                                              | DOI: 10.3390/ijms19082379                                    |
| PL4_2              | Pectin           | DOI: 10.1111/tpj.14417                                                                                                                                                                      | DOI: 10.3390/ijms19082380                                    |
| PL4_4              | Pectin           | Hu, H. (2019). The Antimicrobial Defence and Biomass Decomposition of Fungus-Growing Termites and Microbial Symbionts. Department of Biology, Faculty of Science, University of Copenhagen. | DOI: 10.3390/ijms19082381                                    |
| PL4_5              | Pectin           | Theobald, S. Genus-level studies of gene dynamics for the <i>Aspergillus</i> genus. (2018).                                                                                                 | DOI: 10.3390/ijms19082382                                    |
| GH115              | Mannan           | DOI: 10.1186/s12896-015-0154-8                                                                                                                                                              | DOI: 10.1186/1471-2164-15-6; DOI: 10.1186/s12896-015-0154-8  |
| GH125              | Mannan           | DOI: 10.1038/nature13995                                                                                                                                                                    | DOI: 10.1371/journal.pone.0116269                            |
| GH130              | Mannan           | DOI: 10.1074/jbc.M115.681460                                                                                                                                                                | DOI: 10.1074/jbc.M115.681460                                 |
| GH36               | Mannan           | DOI: 10.1002/1873-3468.12250                                                                                                                                                                | DOI: 10.1186/1471-2164-15-6                                  |
| GH38               | Mannan           | DOI: 10.1038/nature13995                                                                                                                                                                    | DOI: 10.1186/1471-2164-15-6; DOI: 10.1007/s00253-019-09983-w |
| GH5_7              | mannan           | DOI: 10.1007/s00425-013-2005-y                                                                                                                                                              | DOI: 10.1186/1471-2164-15-37                                 |
| GT62               | Mannan           | DOI: 10.1093/nar/gkt1178                                                                                                                                                                    | DOI: 10.3390/jof4010006; DOI: 10.3390/jof4010006             |
| GT71               | Mannan           | DOI: 10.1093/nar/gkt1178                                                                                                                                                                    | DOI: 10.3389/fmicb.2018.01581                                |
| CBM50              | Chitin           | DOI: 10.1007/s00294-014-0471-9                                                                                                                                                              | DOI: 10.1007/s00294-014-0471-9                               |
| GH18               | Chitin           | DOI: 10.1186/1471-2180-9-184                                                                                                                                                                | DOI: 10.1186/1471-2164-15-6                                  |
| GH20               | Chitin           | DOI: 10.1007/s00294-015-0530-x; DOI: 10.1128/EC.00022-15                                                                                                                                    | DOI: 10.1186/1471-2164-15-6                                  |
| GH76               | Chitin/Mannan    | DOI: 10.3389/fmicb.2019.02294                                                                                                                                                               | DOI: 10.1186/1471-2164-15-6                                  |
| GT2_Chitin_synth_1 | Chitin           | PMID: 13475355                                                                                                                                                                              | DOI: 10.1016/j.celrep.2019.02.090                            |
| GT2_Chitin_synth_2 | Chitin           | PMID: 13475356                                                                                                                                                                              | DOI: 10.1016/j.celrep.2019.02.091                            |
| GH85               | Fungal cell wall | DOI: 10.1093/database/bar020                                                                                                                                                                | DOI: 10.1016/j.cell.2016.10.043                              |

\*Core CAZyme present in all *Candida* cell wall enzymatic assay references (Fig. 1h)

**Supplementary Table 4**, Additional CAZymes that were significantly enriched in AGAu species, these were not included in the main figure.

| <b>CAZYME</b> | <b>p_value</b> | <b>Odd_ratio</b> | <b>Annotation</b>                         | <b>Direction</b> |
|---------------|----------------|------------------|-------------------------------------------|------------------|
| GH114         | 0.00113894     | 0                | Multiple polysaccharide                   | Enriched         |
| GH145         | 0.00909359     | 0                | Sugars                                    | Enriched         |
| GH36          | 0.00909359     | 0                | Cell wall                                 | Enriched         |
| GH43_30       | 0.00013329     | 0                | Xylan                                     | Enriched         |
| GH43_33       | 0.00013329     | 0                | Xylan                                     | Enriched         |
| GH5_24        | 0.00013329     | 0                | Cellulose, hemicellulose & other polymers | Enriched         |
| GH5_42        | 0.00909359     | 0                | Cellulose, hemicellulose & other polymers | Enriched         |
| GH5_5         | 0.00013329     | 0                | Cellulose, hemicellulose & other polymers | Enriched         |
| GH5_7         | 0.00113894     | 0                | Cell wall                                 | Enriched         |
| GH88          | 0.00909359     | 0                | Pectin                                    | Enriched         |
| PL24          | 0.00909359     | 0                | Sugars                                    | Enriched         |

**Supplementary Table 5**, Genes that were selected for validation testing of targeted metabolic pathways. This includes primer sequence, amplicon size, targeted KO and identified in KEGG module with references to its location in *Candida* species.

Table Error! No text of specified style in document..1

| Name                                                                              | Gene | Accession numbers | Primer sequence                            | Amplicon size | BR KEGG ID                   | KO     | KEGG Enzyme           | Gene ID          | KEGG module    | Reference      |
|-----------------------------------------------------------------------------------|------|-------------------|--------------------------------------------|---------------|------------------------------|--------|-----------------------|------------------|----------------|----------------|
| Onithine decarboxylase, ODC                                                       | SPE1 | NC_032089.1       | CTGATGATTCAACGGCTCAA/TCTTTAGCACCCGATCCAAC  | 145           | cal00330                     | K01581 | EC:4.1.1.17           | CAALFM_C100740CA | M00134         | PMID: 9392083  |
| Spermidine Synthase                                                               | SPE3 | NC_032090.1       | CTCACCCAAACCCAAAGAAA/TCAATGTCACAAAGCCAAGC  | 109           | cal00330, cal00270           | K00797 | EC:2.5.1.16           | CAALFM_C206960WA | M00133         | PMID: 21874756 |
| bifunctional choline kinase/ethanolamine kinase [ <i>Candida albicans</i> SC5314] | CKI1 | NC_032091.1       | GGTGGAGGAAGAAGGGGTTA/ATGAATTGGGGA GGGCTAGT | 147           | cal00564                     | K00866 | EC:2.7.1.32           | CAALFM_C305300CA | M00090         | PMID:13061469  |
| Lysophosphatidylcholine acyltransferase [ <i>Candida albicans</i> SC5314]         | TAZ1 | NC_032090.1       | AAAAGTGGCTCCCGAAGATT/GTGATCTCCATTG CTCACGA | 140           | sce01004                     | K13510 | EC:2.3.1.23, 2.3.1.67 | YPR140W          | -              | PMID: 17182612 |
| tetrafunctional fatty acid synthase [ <i>Candida albicans</i> SC5314 ]            | FAS1 | NC_032093.1       | ACCAATTGCACCCATCATT/CAGGAGTGGTTCTGGGTGT    | 84            | cal00061, cal01100, cal01212 | K00668 | EC:2.3.1.86           | CAALFM_C500190CA | M00082         | PMID:3528750   |
| trifunctional fatty acid synthase subunit [ <i>Candida albicans</i> SC5314]       | FAS2 | NC_032091.1       | GTTTGTGGTGCTGTCATTGG/TGAAAGCCATTTCTTTTGG   | 121           | cal00061, cal01100, cal01212 | K00667 | EC:2.3.1.86           | CAALFM_C304830CA | M00082, M00083 | PMID:2900835   |
