# Supplementary material for: Integrative functional analysis uncovers metabolic differences between Candida species
Source: PubMed Central journal article supplement (PMC9512779; doi:10.1038/s42003-022-03955-z), 2022-09-26
Supplement: 42003_2022_3955_MOESM3_ESM.pdf [file 42003_2022_3955_MOESM3_ESM.pdf]

## Description of Additional Supplementary Files

**File name:** Supplementary Data 1

**Description:** Fungal species in KEGG database. List of 128 fungal genes in KEGG database, species abbreviation, T number, protein-encoding genes and genes converted to KO.

**File name:** Supplementary Data 2

**Description:** The building of BioFung. List of fungal-specific KO available in KEGG database, genes available per KO, missing genes from KO, missing sequences of genes unable to include and failure of multi-sequence alignment in creating BioFung.

**File name:** Supplementary Data 3

**Description:** Missing information from the KEGG database. List of genes in fungal species had missing sequences and was unable to collate in profile.

**File name:** Supplementary Data 4

**Description:** The categorisation of Pfam clans. Categories were based on clan function to the associated processes; note clans can fit into many functional categories.

**File name:** Supplementary Data 5

**Description:** References for Pectin CAZyme assay confirmation. List of publications confirming the function of pectin. Table 9, References for RT-qPCR validation. List of gene selection, primer sequence and accession numbers for gene expression analysis.

**File name:** Supplementary Data 6

**Description:** Metabolic pathways enriched in all *Candida* species from functional annotation of KO and input data to graph from figure 3a.

**File name:** Supplementary Data 7

**Description:** Metabolite concentration of AGAu and non-AGAu strains from 40 metabolomics and input data for figure 3c.
